# Supplementary material for: Mercury pollution in vegetables, grains and soils from areas surrounding coal-fired power plants
Source: PubMed Central journal article supplement (PMC5422849; doi:10.1038/srep46545), 2017-05-09
Supplement: srep46545-s1.pdf [file srep46545-s1.pdf]

# Supplementary Information

## **Mercury pollutions in vegetables, grains and soils from areas surrounding coal-fired power plants**

Rui Li<sup>1, #</sup>, Han Wu<sup>1, #</sup>, Jing Ding<sup>1</sup>, Weimin Fu<sup>1</sup>, Lijun Gan<sup>2 \*</sup> & Yi Li<sup>1, 3 \*</sup>

#: these authors contributed equally to this work

1. College of Horticulture, Nanjing Agricultural University, Nanjing, 210095, P. R. China.
2. College of Life Sciences, Nanjing Agricultural University, Nanjing, 210095, P. R. China.
3. Department of Plant Science and Landscape Architecture, University of Connecticut, Storrs, CT 06269, USA

### **Correspondence and requests for materials**

Correspondence and requests for materials should be addressed to Y. L. ([yi.li@uconn.edu](mailto:yi.li@uconn.edu)) and L. G. ([ganlj@njau.edu.cn](mailto:ganlj@njau.edu.cn)). Y.L. holds a 2 month/year visiting professor position at NAU.

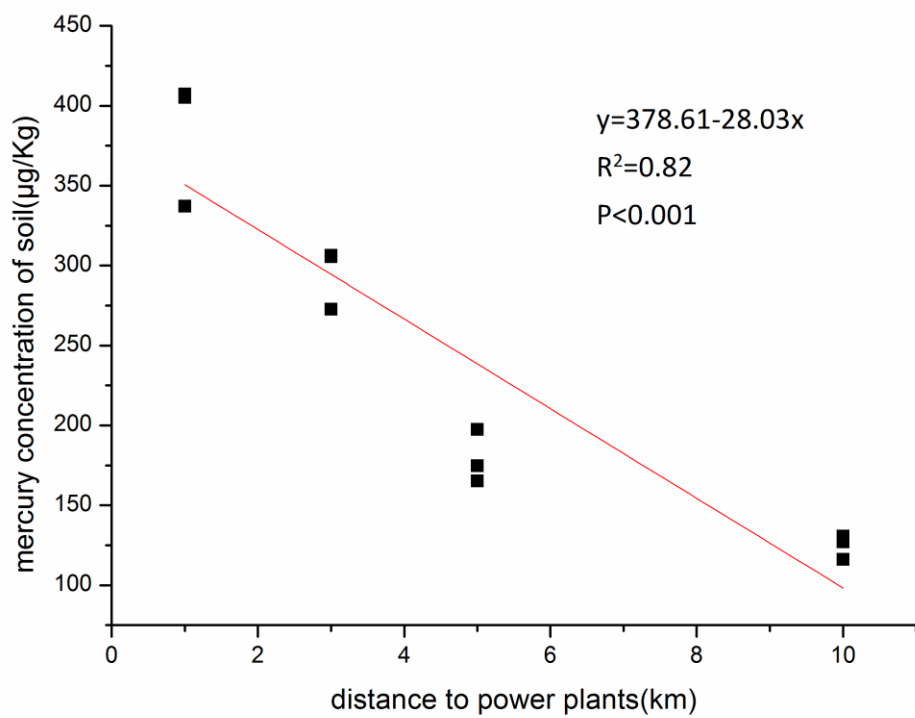

Supplemental Fig. 1: The mercury concentrations in the soil samples were negatively correlated with their distance to the studied coal-fired power plants

| Samples          | Mercury concentration ( $\mu\text{g}/\text{kg}$ ) |                    |                    |                   |
|------------------|---------------------------------------------------|--------------------|--------------------|-------------------|
|                  | Location B1                                       | Location B2        | Location B3        | Location B4       |
| Lettuce***       | 21.03 $\pm$ 0.16                                  | 19.41 $\pm$ 1.16   | 9.17 $\pm$ 0.52    | 7.23 $\pm$ 0.57   |
| Amaranth**       | 29.29 $\pm$ 5.06                                  | 7.50 $\pm$ 0.21    | 5.52 $\pm$ 0.86    | 3.64 $\pm$ 0.37   |
| Water spinach*** | 54.46 $\pm$ 4.55                                  | 49.19 $\pm$ 0.28   | 38.97 $\pm$ 3.43   | 23.88 $\pm$ 1.28  |
| Tomato*          | 76.33 $\pm$ 5.47                                  | 57.09 $\pm$ 8.33   | 29.07 $\pm$ 1.45   | 9.79 $\pm$ 0.43   |
| Eggplant*        | 43.36 $\pm$ 1.71                                  | 25.02 $\pm$ 1.80   | 14.61 $\pm$ 2.95   | 3.25 $\pm$ 0.41   |
| Cucumber*        | 18.21 $\pm$ 1.19                                  | 16.94 $\pm$ 0.66   | 10.09 $\pm$ 0.40   | 2.18 $\pm$ 0.34   |
| Cowpea**         | 57.30 $\pm$ 9.24                                  | 21.75 $\pm$ 1.55   | 18.46 $\pm$ 0.61   | 11.20 $\pm$ 0.95  |
| Rice*            | 59.21 $\pm$ 4.36                                  | 43.30 $\pm$ 2.19   | 37.15 $\pm$ 2.39   | 24.99 $\pm$ 1.99  |
| Soil             | 383.23 $\pm$ 32.59                                | 294.91 $\pm$ 15.67 | 179.14 $\pm$ 13.53 | 124.58 $\pm$ 6.14 |

\* =  $P < 0.05$ , \*\* =  $P < 0.01$ , \*\*\* =  $P < 0.001$ , the significance test was applied between samples with vegetable or grain samples and respective soil samples collected in the same field.

Supplemental table 1: The T-test result of mercury concentration vegetable and grain samples with soil samples
